# Supplementary material for: Detection of Staphylococcus Isolates and Their Antimicrobial Resistance Profiles and Virulence Genes from Subclinical Mastitis Cattle Milk Using MALDI-TOF MS, PCR and Sequencing in Free State Province, South Africa
Source: MDPI journal article supplement (doi:10.3390/ani14010154), 2024-01-02
Supplement: s1 [file s1]

| Isolates ID | Sequence length | 16S rRNA results      | Accession number |
|-------------|-----------------|-----------------------|------------------|
| 1.1         | 1450            | <i>S. aureus</i>      | OP341380         |
| 1.2         | 1453            | <i>S. chromogenes</i> | OP341381         |
| 1.3         | 1464            | <i>S. aureus</i>      | OP341382         |
| 1.4         | 1451            | <i>S. chromogenes</i> | OP341383         |
| 1.5         | 1443            | <i>S. aureus</i>      | OP341384         |
| 1.6         | 1453            | <i>S. aureus</i>      | OP341385         |
| 1.7         | 1456            | <i>S. aureus</i>      | OP341386         |
| 1.8         | 1454            | <i>S. aureus</i>      | OP341387         |
| 1.9         | 1452            | <i>S. aureus</i>      | OP341388         |
| 1.10        | 1455            | <i>S. argenteus</i>   | OP341389         |
| 2.1         | 1455            | <i>S. chromogenes</i> | OP341390         |
| 2.2         | 1430            | <i>S. aureus</i>      | OP341391         |
| 2.3         | 1438            | <i>S. aureus</i>      | OP341392         |
| 2.4         | 1454            | <i>S. aureus</i>      | OP341392         |
| 2.5         | 1456            | <i>S. aureus</i>      | OP341393         |
| 2.6         | 1454            | <i>S. aureus</i>      | OP341394         |
| 2.7         | 1437            | <i>S. aureus</i>      | OP341395         |
| 2.8         | 1435            | <i>S. chromogenes</i> | OP341396         |
| 2.9         | 1455            | <i>S. argenteus</i>   | OP341397         |
| 2.10        | 1445            | <i>S. aureus</i>      | OP341398         |
| 3.1         | 1461            | <i>S. aureus</i>      | OP341399         |
| 3.2         | 1329            | <i>S. agnetis</i>     | OP341400         |
| 3.3         | 1445            | <i>S. chromogenes</i> | OP341401         |
| 3.4         | 1448            | <i>S. aureus</i>      | OP341402         |
| 3.5         | 1418            | <i>S. aureus</i>      | OP341403         |
| 3.6         | 1461            | <i>S. aureus</i>      | OP341404         |
| 3.7         | 1459            | <i>S. aureus</i>      | OP341405         |
| 3.8         | 1454            | <i>S. agnetis</i>     | OP341406         |
| 3.9         | 1450            | <i>S. agnetis</i>     | OP341407         |
| 3.10        | 1451            | <i>S. aureus</i>      | OP341408         |
| 4.1         | 1441            | <i>S. aureus</i>      | OP341409         |
| 4.2         | 1450            | <i>S. aureus</i>      | OP341410         |
| 4.3         | 1434            | <i>S. aureus</i>      | OP341411         |
| 4.4         | 1458            | <i>S. aureus</i>      | OP341412         |
| 4.5         | 1423            | <i>S. aureus</i>      | OP341412         |
| 4.6         | 1458            | <i>S. aureus</i>      | OP341414         |
| 4.7         | 1451            | <i>S. aureus</i>      | OP341415         |
| 4.8         | 1455            | <i>S. derviesei</i>   | OP341416         |
| 4.9         | 1439            | <i>S. aureus</i>      | OP341417         |
| 4.10        | 1425            | <i>S. aureus</i>      | OP341418         |
| 5.1         | 1451            | <i>S. aureus</i>      | OP341419         |
| 5.2         | 1451            | <i>S. aureus</i>      | OP341420         |
| 5.3         | 1423            | <i>S. aureus</i>      | OP341421         |
| 5.4         | 1455            | <i>S. aureus</i>      | OP341422         |
| 5.5         | 1450            | <i>S. aureus</i>      | OP341423         |
| 5.6         | 1456            | <i>S. aureus</i>      | OP341424         |
| 5.7         | 1430            | <i>S. aureus</i>      | OP341425         |
| 5.8         | 871             | <i>S. agnetis</i>     | OP341426         |
| 5.9         | 1448            | <i>S. aureus</i>      | OP341427         |

|      |      |                  |          |
|------|------|------------------|----------|
| 5.10 | 1454 | <i>S. aureus</i> | OP341389 |
|------|------|------------------|----------|
